# Supplementary material for: A donor-specific QTL, exhibiting allelic variation for leaf sheath hairiness in a nested association mapping population, is located on barley chromosome 4H
Source: PubMed Central journal article supplement (PMC5720540; doi:10.1371/journal.pone.0189446), 2017-12-07
Supplement: pone.0189446.s002.pdf [file pone.0189446.s002.pdf]

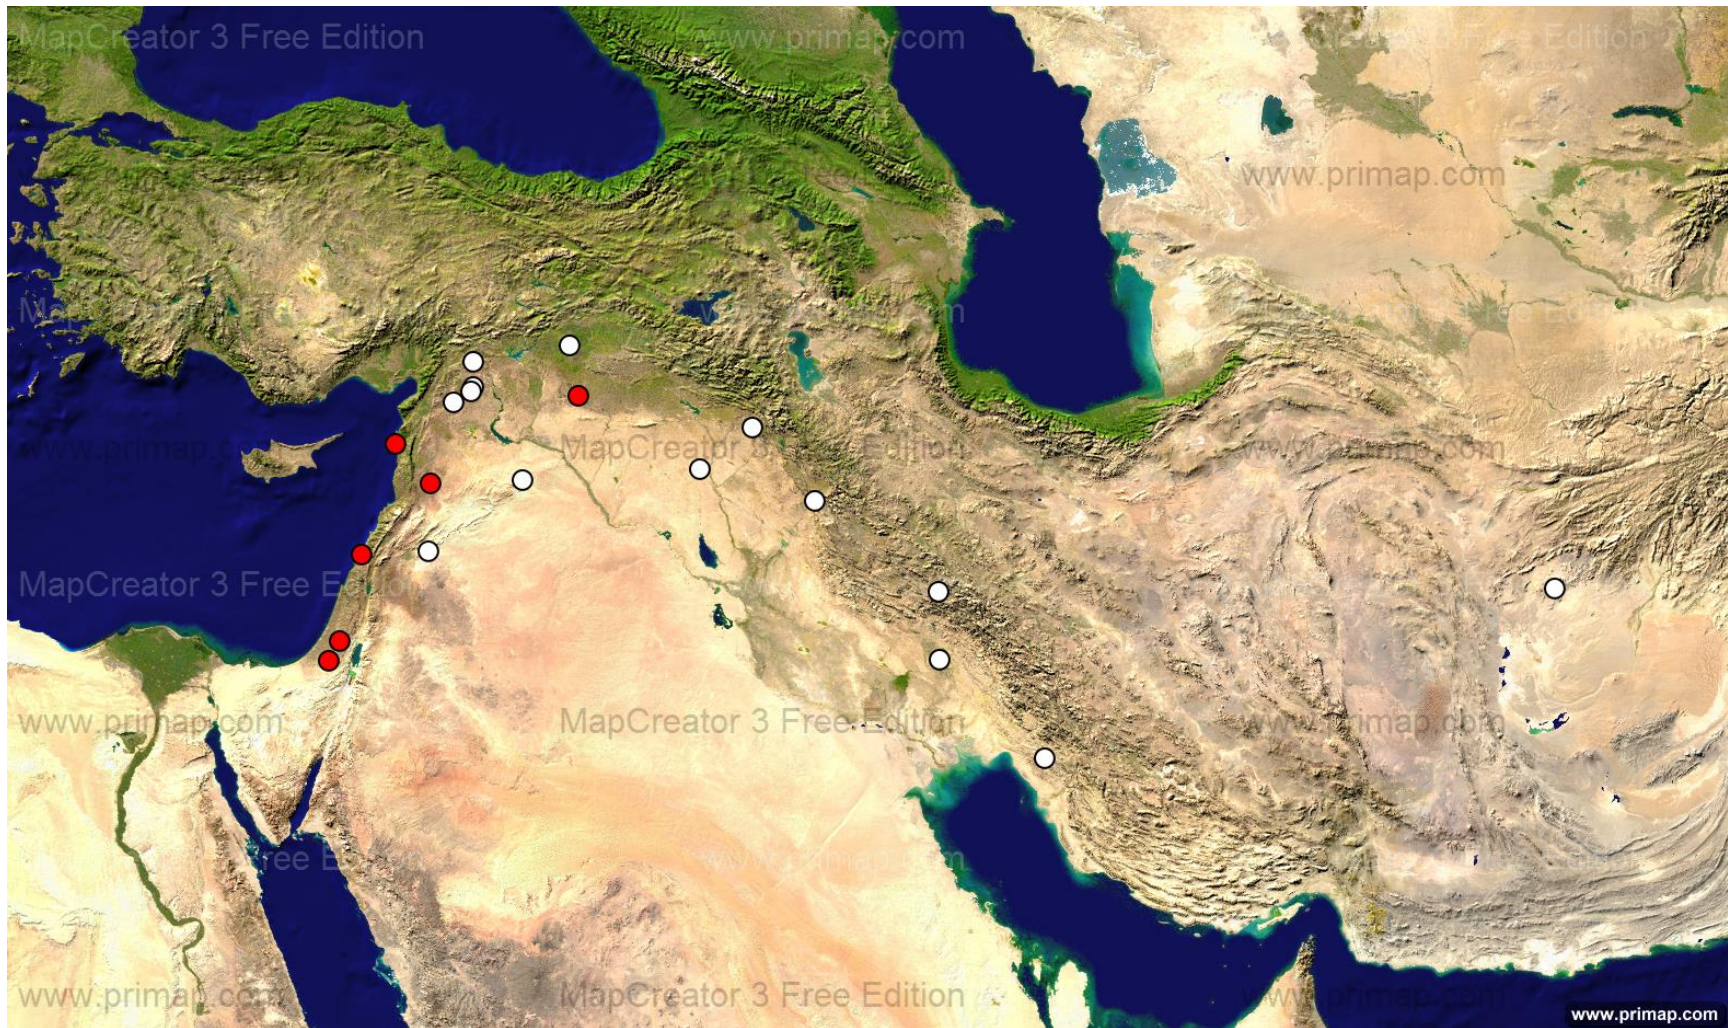

**S2 Fig. Map indicating the geographic origin of wild barley donors of HEB-25**

Red and white dots indicate origins of hairy and non-hairy donors of HEB-25, respectively.
