# Supplementary material for: A donor-specific QTL, exhibiting allelic variation for leaf sheath hairiness in a nested association mapping population, is located on barley chromosome 4H
Source: PLoS One. 2017 Dec 7;12(12):e0189446. doi: 10.1371/journal.pone.0189446 (PMC5720540; doi:10.1371/journal.pone.0189446)
Supplement: S3 Table — (XLSX) [file pone.0189446.s006.xlsx]

## Sheet: S3 Table
S3 Table: Donor-specific QTL effects on leaf sheath hairiness for 25 HEB families.
QTL	Chr a)	Pos a)	Lower b)	Upper b)	No. of sign. SNPs c)	F01	F02	F03	F04	F05	F06	F07	F08	F09	F10	F11	F12	F13	F14	F15	F16	F17	F18	F19	F20	F21	F22	F23	F24	F25
1H-35.7cM	1H	35.7	22.7	48.7	1	0.106327	0	0	0	0	0	0	0	0	0	0	0	0	0	0	0	0	0	0	0	0	0	0	0.106327	0
1H-86.9cM	1H	86.9	73.9	99.9	1	0	0	0	0	0	0	0	0	0	0	0	0	0	0	0	0	0	0	0	0	0	0	-0.73659	0	0
1H-100.1cM	1H	100.1	87.1	113.1	1	0	0	0	0	0	0	0	0	0	0	0	0	0	-0.35028	0	0	0	0	0	0	0	0	-0.35028	0	0
2H-15.4cM	2H	15.4	2.4	28.4	1	0	0	0	0	0	0	0	0	0	0	0	0	0	0	0	0	0	0	0	0	0	0	0.220995	0	0.220995
2H-90.7cM	2H	90.7	77.7	103.7	1	0	0	0	0	0	0	0	0	0	-0.80683	0	0	0	0	0	0	0	0	0	0	0	0	0	0	0
3H-17.5cM	3H	17.5	4.5	30.5	2	0	0	0	0	0	0	0	0	0	0	0	0	0	0	0	0	0	0	0	0	0	0	0.87086	0	0.24717
3H-63.0cM	3H	63	50	76	1	0	0	-0.39642	0	0	0	0	0	0	0	-0.39642	0	0	0	0	0	0	0	0	0	0	0	-0.39642	0	0
3H-104.3cM	3H	104.3	91.3	117.3	1	0	0	0.359289	0	0	0	0	0	0	0	0.359289	0	0	0	0	0	0	0	0	0	0	0	0	0	0
4H-111.3cM	4H	111.3	98.3	124.3	27	0.273204	-0.33533	3.05941	0.124332	0.336063	0.044076	-0.02268	-0.27979	-0.00977	3.48746	4.3271	1.88199	0.369031	0.101601	0.062846	0.284821	0.481541	-0.66888	-0.04431	-0.21806	0.170163	0.211605	2.75996	-0.34458	2.49567
5H-49.85cM	5H	49.85	36.85	62.85	2	0	0	0.416415	0	0	0	0	0	0.179046	0.179046	0.179046	0.237369	0	0	0	0	0	0	0	0	0	0	0.416415	0.179046	0
5H-73.3cM	5H	73.3	60.3	86.3	1	0.157259	0	0.157259	0	0	0	0	0	0	0	0	0	0	0	0	0	0	0	0	0	0	0	0.157259	0	0
5H-118.8cM	5H	118.8	105.8	131.8	1	0	0	-0.35303	0	0	0	0	0	0	0	0	0	0	0	0	0	0	0	0	0	0	0	-0.35303	0	0
5H-161.7cM	5H	161.7	148.7	174.7	1	0	0	0	0	0	0	0	0	0	0	0	0	0	0	0	0	0	0	0	0	0	0	0.541646	0	0
6H-55.4cM	6H	55.4	42.4	68.4	1	0	0	0	0	0	0	0	0	0	0	0	0	0	0	0	0	0	0	0	0	0	0	0.291923	0	0
6H-70.65cM	6H	70.65	57.65	83.65	1	0	0	0	0	0	0	0	0	0	0.482867	0	0	0	0	0	0	0	0	0	0	0	0	0	0	0
7H-48.4cM	7H	48.4	35.4	61.4	1	0	0	0	0	0	0	0	0	0	0.175329	0	0	0	0	0	0	0	0	0	0	0	0	0	0	0
					Intercept:	0.98266	0.98266	0.98266	0.98266	0.98266	0.98266	0.98266	0.98266	0.98266	0.98266	0.98266	0.98266	0.98266	0.98266	0.98266	0.98266	0.98266	0.98266	0.98266	0.98266	0.98266	0.98266	0.98266	0.98266	0.98266
					Hypothetical donor phenotype:	1.51945	0.64733	4.22558	1.10699	1.31872	1.02674	0.95998	0.70287	1.15194	4.50053	5.45167	3.10202	1.35169	0.733981	1.04551	1.26748	1.4642	0.31378	0.93835	0.7646	1.15282	1.19427	4.4054	0.923453	3.9465
A heat map, with red being the highest and green the lowest effect, indicates the hypothetical donor hairiness score for each family based on the cumulated significant SNP marker effects. The cumulating method clearly differentiates between hairy and non-hairy HEB families.
a) Chromosome and position of QTL taken from Maurer et al. (2015).
b) Lower and upper border of the 26 cM window used to estimate the cumulated donor-specific QTL effect.
c) Number of significant markers in the respective QTL interval.
